# Supplementary material for: Psychometric Properties of the NIH Toolbox Cognition and Emotion Batteries Among Children and Adolescents with Congenital Heart Defects
Source: PubMed Central journal article supplement — medRxiv. 2023 Feb 14:2023.02.11.23285800. Preprint. [Version 1] doi: 10.1101/2023.02.11.23285800 (PMC9949204; doi:10.1101/2023.02.11.23285800), 2023-02-14
Supplement: NIHPP2023.02.11.23285800v1-supplement-1.pdf [file NIHPP2023.02.11.23285800v1-supplement-1.pdf]

### Supplemental Table 1

#### *Demographics Split by Group and Distribution of Congenital Heart Defects and Intracranial Injury / Abnormalities Among Participants with CHD*

| Variable / Diagnosis                                              | Control      | CHD          | $X^2 / t$ |
|-------------------------------------------------------------------|--------------|--------------|-----------|
|                                                                   | <i>n</i> (%) | <i>n</i> (%) | <i>p</i>  |
| Males (%)                                                         | 43 (53.75%)  | 45 (77.59%)  | 0.0040    |
| White (%)                                                         | 52 (65.00%)  | 50 (86.21%)  | 0.0051    |
| Right-Hand Dominant (%)                                           | 65 (87.84%)  | 47 (81.03%)  | 0.2793    |
| Preterm Birth (%)                                                 | 8 (13.11%)   | 8 (14.04%)   | 0.8840    |
| Mean Maternal Education ( <i>SD</i> )                             | 1.78 (0.52)  | 1.61 (0.49)  | 0.0563    |
| Mean Household Income ( <i>SD</i> )                               | 3.65 (2.13)  | 3.39 (1.83)  | 0.5303    |
| Mean Age at Assessment ( <i>SD</i> )                              | 12.63 (2.96) | 12.46 (3.35) | 0.7604    |
| <b>Congenital Heart Defect (CHD)</b>                              |              |              |           |
| Single Ventricle (SV)                                             | -            | 26 (44.83%)  | -         |
| Hypoplastic Left Heart Syndrome (HLHS)                            | -            | 13 (22.41%)  | -         |
| Double Inlet Left Ventricle (DILV)                                | -            | 5 (8.62%)    | -         |
| Double Outlet Right Ventricle (DORV)                              | -            | 9 (15.52%)   | -         |
| Aortic Arch Anomaly                                               | -            | 38 (65.52%)  | -         |
| Coarctation of Aorta (COA)                                        | -            | 8 (13.79%)   | -         |
| Hypoplastic / Interrupted Aortic Arch (HAA / IAA)                 | -            | 4 (6.90%)    | -         |
| Bicuspid Aortic Arch (BAV)                                        | -            | 10 (17.24%)  | -         |
| Aortic Valve / Pulmonary Stenosis (AVS / PS)                      | -            | 23 (39.66%)  | -         |
| Total / Partial Anomalous Pulmonary Venous Return (TAPVR / PAPVR) | -            | 3 (5.17%)    | -         |
| Tetralogy of Fallot (TOF)                                         | -            | 4 (6.90%)    | -         |
| Transposition of Great Arteries (TGA)                             | -            | 13 (22.41%)  | -         |
| Atrioventricular Septal Defect (AVSD)                             | -            | 3 (5.17%)    | -         |
| Ventricular / Atrial Septal Defect (VSD / ASD)                    | -            | 28 (48.28%)  | -         |
| Cardiac Surgery                                                   | -            | 52 (89.66%)  | -         |
| Age at 1 <sup>st</sup> Cardiac Surgery ≤ 1 Year                   | -            | 39 (67.24%)  | -         |
| Age at 1 <sup>st</sup> Cardiac Surgery ≤ 7 Days                   | -            | 19 (32.76%)  | -         |
| <b>Intracranial Injury / Abnormality</b>                          |              |              |           |
| Hemorrhage                                                        | -            | 4 (6.90%)    | -         |
| Stroke                                                            | -            | 6 (10.34%)   | -         |
| Encephalomalacia                                                  | -            | 2 (3.45%)    | -         |
| Ventriculomegaly / Hydrocephalus                                  | -            | 2 (3.45%)    | -         |
| Gliosis                                                           | -            | 3 (5.17%)    | -         |
| Necrosis                                                          | -            | 1 (1.72%)    | -         |
| Volume Loss                                                       | -            | 5 (8.62%)    | -         |
| Structural Abnormalities                                          | -            | 6 (10.34%)   | -         |

*Note.* Maternal Education: 0 = no high school diploma, 1 = high school diploma, 2 = college graduate and above. Household Income: 0 = less than \$25,000, 1 = \$25,000 to \$34,999, 2 = \$35,000 to \$49,999, 3 = \$50,000 to \$74,999, 4 = \$75,000 to \$99,999, 5 = \$100,000 to \$149,999; 6 = \$150,000 or more.

## Supplemental Table 2

### Group Differences for Clinician-Issued Battery and Rating Scales

| Test / Composite / Scale               | Control  |                     | CHD      |                     | <i>t</i> | <i>p</i> |
|----------------------------------------|----------|---------------------|----------|---------------------|----------|----------|
|                                        | <i>n</i> | $\mu$ ( <i>SD</i> ) | <i>n</i> | $\mu$ ( <i>SD</i> ) |          |          |
| WASI-II: Vocabulary                    | 61       | 57.61 (9.768)       | 44       | 53.98 (8.851)       | 1.953    | 0.054    |
| Verbal Comprehension Index             | 61       | 110.70 (14.024)     | 44       | 105.70 (12.275)     | 1.898    | 0.061    |
| Perceptual Reasoning Index             | 61       | 108.41 (15.174)     | 42       | 99.52 (18.081)      | 2.700    | 0.008    |
| Full Scale IQ                          | 61       | 110.67 (13.314)     | 42       | 102.79 (15.889)     | 2.729    | 0.008    |
| NEPSY-2: Comprehension of Instructions | 69       | 11.74 (2.984)       | 44       | 10.41 (2.773)       | 2.374    | 0.019    |
| WISC-IV: Digit Span                    | 67       | 10.45 (3.001)       | 44       | 9.00 (2.745)        | 2.570    | 0.012    |
| Letter Number Sequencing               | 61       | 11.15 (2.072)       | 44       | 9.50 (2.758)        | 3.341    | 0.001    |
| Coding                                 | 66       | 10.56 (3.379)       | 42       | 8.26 (3.140)        | 3.541    | 0.001    |
| Symbol Search                          | 66       | 11.74 (2.963)       | 42       | 10.10 (2.621)       | 2.943    | 0.004    |
| Working Memory Index                   | 67       | 103.75 (12.679)     | 44       | 95.02 (13.498)      | 3.456    | 0.001    |
| Processing Speed Index                 | 66       | 106.65 (16.051)     | 42       | 95.45 (14.397)      | 3.676    | <0.001   |
| D-KEFS: TMT – Number Letter Switching  | 62       | 10.94 (2.268)       | 35       | 8.31 (2.888)        | 4.944    | <0.001   |
| VFT – Switching                        | 63       | 11.33 (3.188)       | 38       | 10.32 (2.672)       | 1.648    | 0.102    |
| CWIT – Inhibition                      | 54       | 10.80 (2.326)       | 27       | 8.74 (2.982)        | 3.406    | 0.001    |
| WRAML-2: Design Memory                 | 70       | 9.90 (2.959)        | 42       | 7.64 (2.448)        | 4.160    | <0.001   |
| ABAS-II: Global Adaptive Composite     | 66       | 104.67 (13.324)     | 43       | 95.26 (17.159)      | 3.213    | 0.002    |
| Conceptual Composite                   | 68       | 106.71 (12.930)     | 44       | 96.86 (14.767)      | 3.719    | <0.001   |
| Social Composite                       | 68       | 105.46 (13.895)     | 44       | 98.95 (15.622)      | 2.302    | 0.023    |
| Practical Composite                    | 66       | 101.70 (13.791)     | 43       | 92.23 (16.883)      | 3.202    | 0.002    |
| BASC-2: Externalizing Composite        | 70       | 43.73 (8.446)       | 43       | 46.05 (8.588)       | -1.407   | 0.162    |
| Internalizing Composite                | 70       | 43.54 (9.234)       | 44       | 53.00 (13.701)      | -4.038   | <0.001   |
| Behavior Symptoms Index                | 70       | 43.89 (7.700)       | 44       | 48.75 (11.115)      | -2.544   | 0.013    |
| Adaptive Composite                     | 70       | 55.50 (11.553)      | 44       | 48.64 (12.529)      | 2.989    | 0.003    |
| PedsQL: Parent Report – Total          | 64       | 91.73 (9.623)       | 44       | 71.737 (19.349)     | 6.338    | <0.001   |
| Child Report – Total                   | 42       | 81.55 (13.497)      | 16       | 72.92 (13.486)      | 2.178    | 0.034    |

*Note.* WASI-II: *T*-scores for subtests ( $M = 50$ ,  $SD = 10$ ) and standard scores for composites ( $M = 100$ ,  $SD = 15$ ). D-KEFS: scaled scores ( $M = 10$ ,  $SD = 3$ ). NEPSY-2: scaled scores ( $M = 10$ ,  $SD = 3$ ). WISC-IV: scaled scores for subtests ( $M = 10$ ,  $SD = 3$ ) and standard scores for composites ( $M = 100$ ,  $SD = 15$ ).

WRAML-2: scaled score ( $M = 10$ ,  $SD = 3$ ). ABAS-II: standard scores ( $M = 100$ ,  $SD = 15$ ). BASC-2: *T*-scores ( $M = 50$ ,  $SD = 10$ ).
